# Preservation of Differentiation and Clonogenic Potential of Human Hematopoietic Stem and Progenitor Cells during Lyophilization and Ambient Storage

Sandhya S. Buchanan<sup>1\*</sup>, David W. Pyatt<sup>2</sup>, John F. Carpenter<sup>1</sup>

**1** Center for Pharmaceutical Biotechnology and Department of Pharmaceutical Sciences, University of Colorado, Aurora, Colorado, United States of America, **2** Summit Toxicology, Superior, Colorado, United States of America

## Abstract

Progenitor cell therapies show great promise, but their potential for clinical applications requires improved storage and transportation. Desiccated cells stored at ambient temperature would provide economic and practical advantages over approaches employing cell freezing and subzero temperature storage. The objectives of this study were to assess a method for loading the stabilizing sugar, trehalose, into hematopoietic stem and progenitor cells (HPC) and to evaluate the effects of subsequent freeze-drying and storage at ambient temperature on differentiation and clonogenic potential. HPC were isolated from human umbilical cord blood and loaded with trehalose using an endogenous cell surface receptor, termed P2Z. Solution containing trehalose-loaded HPC was placed into vials, which were transferred to a tray freeze-dryer and removed during each step of the freeze-drying process to assess differentiation and clonogenic potential. Control groups for these experiments were freshly isolated HPC. Control cells formed  $1450 \pm 230$  CFU-GM,  $430 \pm 140$  BFU-E, and  $50 \pm 40$  CFU-GEMM per 50  $\mu$ L. Compared to the values for the control cells, there was no statistical difference observed for cells removed at the end of the freezing step or at the end of primary drying. There was a gradual decrease in the number of CFU-GM and BFU-E for cells removed at different temperatures during secondary drying; however, there were no significant differences in the number of CFU-GEMM. To determine storage stability of lyophilized HPC, cells were stored for 4 weeks at 25°C in the dark. Cells reconstituted immediately after lyophilization produced  $580 \pm 90$  CFU-GM (~40%, relative to unprocessed controls  $p < 0.0001$ ),  $170 \pm 70$  BFU-E (~40%,  $p < 0.0001$ ), and  $41 \pm 22$  CFU-GEMM (~82%,  $p = 0.4171$ ), and cells reconstituted after 28 days at room temperature produced  $513 \pm 170$  CFU-GM (~35%, relative to unprocessed controls,  $p < 0.0001$ ),  $112 \pm 68$  BFU-E (~26%,  $p < 0.0001$ ), and  $36 \pm 17$  CFU-GEMM (~82%,  $p = 0.2164$ ). These studies are the first to document high level retention of CFU-GEMM following lyophilization and storage for 4 weeks at 25°C. This type of flexible storage stability would potentially permit the ability to ship and store HPC without the need for refrigeration.

**Citation:** Buchanan SS, Pyatt DW, Carpenter JF (2010) Preservation of Differentiation and Clonogenic Potential of Human Hematopoietic Stem and Progenitor Cells during Lyophilization and Ambient Storage. PLoS ONE 5(9): e12518. doi:10.1371/journal.pone.0012518

**Editor:** Nuno M. Neves, University of Minho, Portugal

**Received:** May 30, 2010; **Accepted:** July 20, 2010; **Published:** September 1, 2010

**Copyright:** © 2010 Buchanan et al. This is an open-access article distributed under the terms of the Creative Commons Attribution License, which permits unrestricted use, distribution, and reproduction in any medium, provided the original author and source are credited.

**Funding:** The authors would like to acknowledge the Defense Advanced Research Projects Agency/Naval Research Laboratories Grant Number N00173-01-1 G011 for providing funding for these studies. Website: <http://www.darpa.mil/>. The funders had no role in study design, data collection and analysis, decision to publish, or preparation of the manuscript.

**Competing Interests:** Intervet Schering Plough Animal Health funded this study only by author employment at the time of submission. This funder had no role in study design, data collection and analysis, decision to publish, or preparation of the manuscript. There are no related patents or products in development. Summit Toxicology funded this study by author employment at the time of submission. This funder had no role in study design, data collection and analysis, decision to publish, preparation of the manuscript. There are no related consulting, patents or products in development.

\* E-mail: Sandhya.Buchanan@Merck.com

† Current address: Intervet Schering Plough, Discovery and Technology, Elkhorn, Nebraska, United States of America

## Introduction

Hematopoietic stem and progenitor cells (HPC) contain populations of cells with long-term and short-term regeneration capacities as well as committed progenitors. HPC give rise to all the blood cell types including lymphoid (T-cells, B-cells, NK-cells, dendritic) and myeloid (monocytes/macrophages, neutrophils, megakaryocytes, granulocytes, eosinophils, erythrocytes)[1]. These cells can be isolated from bone marrow, peripheral blood, or human umbilical cord blood (UCB) and have been shown to be valuable for treatment of a wide variety of human diseases[2,3,4,5,6,7,8]. As a result, there is a growing need for producing, storing and shipping large numbers of HPC to ensure a steady supply for use in clinical applications. Simple preservation techniques, such as refrigeration or tissue culture, have drawbacks

including limited shelf life, high cost and risk of contamination. Alternatively, cryopreservation has been successfully utilized for long-term storage of HPC. This approach is based on the principle that chemical, biological and physical processes are sufficiently “suspended” at cryogenic temperatures (−196°C) because liquid water does not exist below −130°C[9]. In fact, the only physical states that exist at cryogenic temperature are crystalline or glassy (also called amorphous), and in both the viscosity is so high ( $\geq 10^{13}$  poise) that the rates of diffusion controlled reactions are insignificant on practical time scales[10,11,12]. Furthermore, there is insufficient thermal energy for chemical and metabolic processes to proceed at practical relevant rates[9,13].

Conventionally, cryopreservation protocols employ high relative concentrations (e.g., 1.0–2.0 M) of cryoprotectants such as dimethyl sulfoxide (DMSO), glycerol or ethylene glycol[9,14]

because they readily penetrate cell membranes and thus confer protection to the intracellular components. Some complications associated with the use of these permeable cryoprotectants include an exceptionally low glass transition temperature ( $<-83^{\circ}\text{C}$ ) [15]. Low glass transition temperatures require tight control of temperature during product storage and transfer. Thermal excursions or storage above the glass transition temperature results in an increase in motion as a result of the large decrease in matrix viscosity. Decreased viscosity allows diffusion to occur and can result in degradation of frozen cells and tissues [9,16,17,18].

More importantly, freezing media containing DMSO have shown to be toxic to patients [19,20,21,22,23]. Efforts to reduce toxicity include the removal of DMSO prior to transfusion or decreasing the amounts used in the freezing process [24,25,26]. An alternative to DMSO includes nontoxic sugars such as trehalose. Trehalose is a non-toxic, non-reducing disaccharide of glucose that possesses an exceptional ability to stabilize and preserve cells and cellular structures during freezing [14,27,28,29,30] and drying [31,32]. The utility of trehalose as a cryoprotectant has been attributed to its protective interactions with lipid membranes, stabilization of labile proteins during freezing-thawing, its chemical stability and the ability to form stable glasses during cooling of cells for cryopreservation [31,32,33,34,35,36,37]. For cell preservation, formation of a glassy matrix in the cell's interior also can contribute to the inhibition of potentially lethal intracellular ice crystals and minimize cell damage to excessive concentration of electrolytes. One obstacle in the utility of trehalose as a cryoprotectant is overcoming its impermeability to mammalian cell membranes, which has been investigated extensively [31,38,39,40,41,42,43,44,45,46,47].

As a first step toward preserving HPC by freeze drying, we previously investigated the permeabilization of a model cell line (TF-1) to trehalose [48]. TF-1 cells are CD34 positive, cytokine-dependent, and retain the ability to differentiate into erythroid, monocytic and megakaryocytic lineages following appropriate stimulation [49,50,51,52,53]. These characteristics make them an appropriate surrogate for primary HPC in evaluating the effects of the critical processing steps. TF-1 cells were permeabilized to trehalose using an endogenous cell surface receptor, termed P2Z [54,55,56], which is synonymous with P2X<sub>7</sub> [57]. In the presence of millimolar concentrations of extracellular uncomplexed adenosine-5-triphosphate (e.g., ATP<sup>4-</sup>), this protein forms nonselective pores that render plasma membranes permeable to small molecules (e.g., MW $\leq$ 900 Da) [58,59,60]. This effect is reversed by a ten-fold dilution (to reduce the ATP concentration) and the addition of magnesium to complex with ATP, so that cells can be permeabilized transiently [61]. The average number of TF-1 cells positive for the P2Z receptor was approximately 86%. Cells loaded with 200 mM (6.8% w/v) trehalose were frozen and stored at  $-80^{\circ}\text{C}$  for 4 months. Following storage, thawed cells were evaluated for differentiation capacity and clonogenic output. Results obtained with this technique were compared to conventional freezing protocols using 10% (v/v, 1.4 mM) dimethyl sulfoxide (DMSO). Colony forming units (CFU) generated from cells frozen with intra- and extracellular trehalose were essentially equivalent in size, morphology, and number ( $\sim 91\%$ ) to those generated from unfrozen cells. Furthermore, there were no significant alterations in phenotypic markers of differentiation (CD34, CD33, and CD235a), activation (CD38), and proliferation (CD71). The P2Z receptor is expressed in many hematopoietic cells including myeloid progenitors, CD34<sup>+</sup> peripheral blood progenitor cells as well as neutrophils, dendritic, granulocytes, monocytes/macrophages, lymphocytes, and erythrocytes [58,62,63,64].

In this study we explore the ability of intra- and extracellular trehalose to protect human HPC during freezing, drying and storage at room temperature for 4 weeks. To ensure maximum uptake of sugar, cells were permeabilized via the P2Z receptor with two different types of porating agent: ATP and benzoyl ATP (BzATP), a more potent agonist. Successful preservation criteria for HPC include retaining the ability to form colonies in semi-solid culture medium and the capability of differentiating to multiple lineages. More mature progenitor cells are capable of forming colony forming unit-erythroid (CFU-E), burst forming unit-erythroid (BFU-E), colony forming unit-granulocyte (CFU-G), megakaryocyte (CFU-Mk), and colony forming unit-granulocyte monocyte/macrophage (CFU-GM), a heterogeneous population of macrophages and granulocytes. Colonies comprised of granulocyte-erythroid-megakaryocyte-macrophage (CFU-GEMM) represent a primitive multi-lineage myeloid progenitor cell that are present in UCB in relatively high numbers compared to more mature cells [1,65,66]. The number of CFU observed can vary depending on the frequency of individual lineage-specific progenitor cells present in UCB obtained from individual subjects and the specific culture conditions. In addition, variability in the number of CFU may occur because we did not quantify nor isolate and identify the types of cells that were positive for the P2Z receptor.

To maximize cell survival during freeze-drying and subsequent storage, it also is important to obtain an optimal residual water content and a sufficiently high glass transition temperature (T<sub>g</sub>) to permit long-term storage ambient storage. Therefore, we also investigated the effects of lyophilization processing steps and resulting residual water content on both cell survival and T<sub>g</sub>.

## Materials and Methods

### Reagents

Sodium bicarbonate, ammonium chloride, sodium ethylenediaminetetraacetic acid (EDTA), 2,3-(4-benzoyl) benzoyl adenosine-5-triphosphate (BzATP) and adenosine-5-triphosphate were purchased from Sigma (St. Louis, MO). Trypan blue, phosphate buffered saline (PBS) without calcium and magnesium, fetal bovine serum (FBS) and Lymphocyte Separation Medium (density = 1.077 g/mL) were purchased from Fisher Scientific (Atlanta, GA). MethoCult® Classic was purchased from Stem Cell Technologies (Seattle, WA). Hydroxyethyl starch (Viastarch, HES) was purchased from Fresenius (Linz, Austria). The HES mean molecular weight, water content, and NaCl content were 259,700 Da, 4.64% and 0.11%, respectively [67]. Bovine serum albumin fraction-V 30% (BSA) was purchased from Gemini BioProducts (West Sacramento, CA). Low endotoxin glucose and trehalose were purchased from Pfanstiehl Laboratories (Waukegan, Illinois). Fluorescein-5-isothiocyanate isomer I (FITC) and propidium iodide (PI) was purchased from Molecular Probes (Eugene, OR).

### Red blood cell lysis buffer

8.3 g ammonium chloride, 1.0 g sodium bicarbonate, and 0.04 g sodium EDTA were dissolved in 1 L ultra pure sterile water. The solution was filter through 0.22  $\mu\text{m}$  filter and stored at  $4^{\circ}\text{C}$ . Red blood cell (RBC) lysis buffer was warmed to  $37^{\circ}\text{C}$  before use.

### Isolation HPC from human umbilical cord blood

All protocols were approved by the University of Colorado Health Sciences Center Internal Review Board (number 01-809). After informed consent, human cord bloods were obtained using sterile tubes with heparin from newborn umbilical cords following

normal vaginal deliveries. Patient consent was written. A translator was available if required or a copy in the native language of the patient was made available as requested. Only UCB that tested negative for HIV were used in this study. Samples were processed within 12 hr of collection.

Cord blood specimens were diluted with an equal volume of RBC lysis buffer and transferred to a 50 mL conical tube. Each specimen tube was then rinsed with 2 mL of RBC lysis buffer and the rinse was added to specimens. Specimens were briefly vortexed and then incubated for 3 minutes at room temperature. Cells were pelleted by centrifugation at 1500 rpm for 10 minutes. The supernatant was decanted and cells were resuspended in PBS/1%BSA equivalent the original specimen volume.

Light-density mononuclear cells (MNC) were isolated by layering cell suspension carefully onto Lymphocyte Separation Medium (density = 1.077 g/mL, 2 volumes of diluted blood to 1 volume of separation medium) and centrifuging at 1500 rpm for 30 minutes at room temperature. MNC (monocytes and lymphocytes) have a lower buoyant density than the erythrocytes and the polymorphonuclear (PMN) leukocytes (granulocytes). Since the majority of MNC have densities below 1.077 g/mL, they can be isolated at the sample/medium interface. The interphase layer containing MNC was collected and washed twice with PBS/1%BSA. After 2 cycles of washing and centrifugation, cell pellets were resuspended in 5 mL of PBS/1%BSA. Cells were counted using a Coulter Counter, and cell viability was assessed by Trypan blue exclusion. No further cell identification or purification was performed.

MNC cells were cultured with MethoCult® Classic. Cytokines in this medium only support cells that give rise to CFU-E, BFU-E, CFU-GM, and CFU-GEMM. All references to these cells will be identified as HPC in the text. (See CFU assay for details)

### Expression of P2Z Receptor on mononuclear cells

Expression of P2Z receptor was measured by permeabilizing HPC with BD Cytofix/Cytoperm kit (BD Biosciences Pharmingen, San Diego, CA) using manufacturer's instructions, staining with anti-P2Z/P2X7 receptor (Calbiochem, La Jolla, CA) polyclonal antibody from rabbit and anti-Rabbit-PE secondary antibody developed in goat (Sigma, St. Louis, MO). Briefly,  $1 \times 10^6$  cells were washed twice with 1 mL of staining buffer (PBS/1% FBS/5% (w/v) sodium azide). To fix cells, HPC were pelleted by centrifugation (1100 rpm for 8 minutes) and then resuspended in 250  $\mu$ L of BD Cytofix/Cytoperm solution for 30 minutes at 4°C. HPC were washed twice in 1 mL of 1X BD Perm/Wash solution. Cells were then resuspended in 50  $\mu$ L of BD Perm/Wash solution containing anti-P2Z/P2X7 (1:100) for 30 minutes at 4°C. Cells were washed twice in 1 mL of 1X BD Perm/Wash solution. Cells were then resuspended in 50  $\mu$ L of 1X BD Perm/Wash solution containing 20  $\mu$ L of anti-Rabbit-PE for 30 minutes at 4°C in the dark. Cells were washed twice in 1 mL staining buffer. Cells were then resuspended in 300  $\mu$ L of staining buffer and stored at 4°C in the dark until flow cytometric analysis. Flow cytometric analysis was performed a Coulter Epics XL equipped with Summit v3.1 and v4 software.

### Cell poration and trehalose loading

HPC were incubated in poration buffer containing 100  $\mu$ M BzATP or 5 mM ATP and 200 mM trehalose at a concentration of  $1 \times 10^6$  cells in 1 mL. Poration buffer is composed of 5 mM glucose, 1X essential amino acids, 1X nonessential amino acids and 1X Vitamin Stock in 10 mM  $K_2HPO_4/KH_2PO_4$  titrated to pH  $7.45 \pm 0.03$  (modified from Menze[68]). Cells were incubated in the reaction mixture for 0–90 min to accommodate trehalose

loading. Pores were closed with the addition of 1 mM  $MgSO_4$  and 10-fold dilution of BzATP or ATP using RPMI 1640.

Poration efficiency for HPC was assessed by FITC/PI staining using flow cytometry as previously described[48,69,70,71,72]. A stock solution of FITC for permeabilization studies was prepared by dissolving 1 mg FITC in 1 mL of DMSO, with further dilution to 0.1 mg/mL using PBS without calcium and magnesium. Briefly, porated cells were loaded with trehalose containing 100  $\mu$ L of 0.1 mg/mL FITC. Pores were closed and excess dye was removed by washing twice with PBS/1%FBS. Approximately  $1 \times 10^5$  porated cells were removed and suspended in 500  $\mu$ L of PBS/1%FBS. Cells were treated with 10  $\mu$ L of 1.0 mg/mL PI, a membrane-impermeant dye, for 4 min prior to analysis. PI labels the nucleic acids of membrane-compromised cells. Cells which stained positive for FITC and negative for PI were gated and considered to be both viable and porated, whereas cells stained with PI were gated and considered to be dead. All reported values were normalized to total cell count. Flow cytometric analysis was performed on a Coulter Epics XL equipped with System II software.

### Lyophilization

After trehalose loading, HPC were lyophilized in a formulation containing 6.8% trehalose/2% HES/5% HSA (w/v). Approximately 1 mL of sample solution was transferred to 5-mL flat bottom borosilicate lyophilization vials (West Pharmaceutical, Lintz, PA), and the vials were placed on the shelf of an FTS DuraStop MP/DuraDry MP freeze-dryer (Stone Ridge, NY). The shelf was cooled from room temperature to  $-45^\circ\text{C}$  at a cooling rate of  $2.5^\circ\text{C}/\text{min}$  until product temperature reached  $-45^\circ\text{C}$ . Samples were maintained  $-45^\circ\text{C}$  for 180 minutes. Primary drying was initiated by raising the shelf temperature from  $-45^\circ\text{C}$  to  $-35^\circ\text{C}$  at  $2.5^\circ\text{C}/\text{minute}$ , reducing the chamber pressure to 80 mTorr and maintaining the shelf temperature at  $-35^\circ\text{C}$  for 2160 minutes. To determine completion of primary drying, the step was monitored using the chamber pressure rise test and equilibration of the product temperature to the shelf temperature, as described previously[69,70]. For secondary drying, samples were warmed by increasing the shelf temperature at a rate of  $0.2^\circ\text{C}/\text{minute}$  to the designated secondary drying temperature to be tested and maintaining the shelf at this temperature for 360 minutes. To determine where clonogenic and differentiation potential is lost during lyophilization, vials were removed at the end of primary drying ( $-35^\circ\text{C}$ ) and during secondary drying (at  $5^\circ$ ,  $10^\circ$ ,  $15^\circ$ , and  $20^\circ\text{C}$ ) from the freeze-drying chamber into an antechamber using a retractable arm. The extracted vials were stoppered in the antechamber under the same pressure as the chamber ( $\sim 80$  mTorr). At the end of the cycle, the trays were raised until the rubber stoppers were pushed down to seal the vials under vacuum before removing them from the unit. All samples were stored at  $-80^\circ\text{C}$  until analysis.

### Rehydration

Lyophilized samples were rapidly reconstituted using high purity water. An aliquot of  $\sim 950$   $\mu$ L water was drawn into a 1 mL serological pipette, and the water was released down the sides of lyophilization vials. To ensure homogeneous resuspension of the cells, the solution containing the cells was then gently drawn into a 1 mL serological pipette and released down the sides of the vials 5-times. Approximately 2 mL of complete medium was added to each vial, and cells were transferred to 10  $\text{cm}^2$  flat bottom tube flasks (MidWest Scientific, St. Louis, MO), and incubated for 2 hr at  $37^\circ\text{C}$  in humidified air containing 5%  $\text{CO}_2$  before plating cells in methylcellulose.

## Colony Forming Unit Assay

Progenitor cell proliferation of control, frozen and thawed or freeze dried, and rehydrated cells was quantified by an *in vitro* method using MethoCult® Classic, a semi-solid methylcellulose system containing stem cell factor (SCF), GM-CSF, interleukin 3 (IL-3), and erythropoietin (StemCell Technologies, Vancouver, BC, Canada) and by measuring clonogenic activity via CFU. The assay was performed with light-density MNC as described above. Cytokines in this medium only support cells that give rise to CFU-E, BFU-E, CFU-GM, and CFU-GEMM. The culture plates used in these studies do not support the growth of anchorage-dependent cells. All references to these cells will be identified as HPC in this text.

Unfrozen control cells were suspended at a concentration of  $1 \times 10^6$  cells/mL and 100  $\mu$ L of cells were removed for culture in 1% methylcellulose. ( $\sim 1 \times 10^5$  as determined by both a Coulter counter and trypan blue exclusion). The 100  $\mu$ L of cells was added to 5 mL of 1% methylcellulose ( $\sim 20,000$  cells/mL). The clonogenic activity of unfrozen control cells was standardized in this manner and considered to be 100% clonogenic potential. Colony identification was based on color and morphology. Only multilineage myeloid colonies were scored (i.e., CFU-GEMM, CFU-GM, or BFU-E).

For freeze-thawing experiments, cell samples were removed at the end of the freezing step of lyophilization and stored at  $-80^\circ\text{C}$  until analysis. Frozen samples were rapidly thawed in a  $37^\circ\text{C}$  water bath. For experiments of cells that were freeze-dried, samples were stored at  $-80^\circ\text{C}$  until analysis. Dried samples were rehydrated as described in the rehydration section above. Following thawing or rehydration, approximately 2 mL of complete medium was added to each sample. Cells were mixed by pipetting with a 5-mL serological pipette 5-times to ensure homogeneous suspension. Cells were then transferred to 10 cm<sup>2</sup> flat bottom tube flasks (MidWest Scientific, St. Louis, MO) and incubated for 2 hr at  $37^\circ\text{C}$  in humidified air containing 5% CO<sub>2</sub>. Following incubation at  $37^\circ\text{C}$ , approximately 50  $\mu$ L of cell suspension was transferred to a 15-mL conical tube with 6 mL of 1% methylcellulose containing growth factors.

Four individual culture plates were scored for each group. All samples were cultured at  $37^\circ\text{C}$  in humidified air containing 5% CO<sub>2</sub> for 14 days, after which colonies were enumerated on an inverted Nikon microscope (1 colony  $\geq 20$  cells).

## T<sub>g</sub> measurements

All samples were analyzed on a Perkin-Elmer Diamond DSC equipped with an Intercooler II and the data were analyzed on Pyris 7.0 software. The DSC was calibrated using indium (for temperature and enthalpy of melting). Vials containing dried samples used for T<sub>g</sub> measurements were placed in a nitrogen-purged dry glove box to avoid possible hydration resulting from exposure to environment and hermetically sealed in aluminum pans. Approximately 10 mg of solid was measured each measurement. Lyophilized samples were heated from 0 to  $200^\circ\text{C}$  at  $100^\circ\text{C}/\text{minute}$ , maintained at  $200^\circ\text{C}$  for 5 minutes, then cooled to  $0^\circ\text{C}$  and reheated again to  $250^\circ\text{C}$  at the same rates to measure T<sub>g</sub> in the second scan. Values are reported as the onset temperature of the glass transition.

## Residual water content

Residual water content of lyophilized samples was determined by Karl Fischer titration using a Mettler DL37 coulometric moisture analyzer (Hightstown, NJ) containing pyridine free vessel solutions (Photovolt Instruments, Inc., St. Louis Park, MN). Samples were prepared in a nitrogen-purged dry glove box to

avoid possible hydration resulting from exposure to environment. Lyophilized samples were dissolved in 1 mL of dimethyl formamide. The samples were sonicated for 15–25 minutes to ensure complete solubility prior to analysis. Using a gas-tight syringe, 250  $\mu$ L were withdrawn through the rubber stopper and moisture analysis was performed as previously described<sup>70</sup>. Values are reported as mass percent water (gH<sub>2</sub>O/100 g solid).

## Storage stability

After lyophilization, stoppered vials containing dehydrated samples were sealed with aluminum caps and stored in an incubator at  $25^\circ\text{C}$  (so-called “controlled room temperature”) in the dark for 4 weeks. At the end of the storage period, samples were rehydrated and analyzed as described above.

## Statistical Analysis

Statistical analyses were performed on CFU assay results using paired-student t test (SigmaPlot 2001) and ANOVA using Dennett's test, which controls overall error rate for comparing all other means with a designated control group's mean (JMP v6-8). Differences among groups were considered significant when *p* value was less than 0.05. Data reported as the mean  $\pm$  the standard deviation of three independent experiments each with quadruplicate samples.

## Results

### Expression of P2ZR and permeabilization of HPC

We investigated the expression of P2Z receptor on HPC using indirect staining and flow cytometric analysis (Figure 1). Staining with secondary antibody alone marked the background fluorescence level by non-specific binding of this antibody to dead or other cells ( $1.6\% \pm 0.3$ , Figure 1A). Fluorescence levels above the background were considered specific for P2Z and shown to be approximately  $58\% \pm 4\%$  (Figure 1B) compared to secondary antibody alone (Overlay of A and B as shown in Figure 1C).

To assess poration efficiency, HPC were permeabilized by exposing them to either 5 mM ATP or 100  $\mu$ M BzATP, which opens the P2Z cell surface receptor, in medium containing 200 mM trehalose and 0.1 mg/mL FITC. FITC was employed as an indicator of poration because it is normally impermeable to cellular membranes and has a similar molecular mass (MW 389) to that of trehalose (MW 342). In the absence of porating agent, less than 1% of cells were positive for the presence of dye. There was a gradual increase in the number of cells positive dye when permeabilized in the presence of ATP, reaching a maximum of  $\sim 31\%$  after 75 minutes (Figure 1D). Permeabilization in the presence of BzATP (a more potent agonist for the P2Z receptor than ATP)[57,60], resulted in a steady increase in the number of cells positive for dye, with  $58\% \pm 4\%$  of cells positive for dye after 90 minutes. The membrane integrity of cells was also monitored during poration using PI. There was a gradual loss in membrane integrity after 90 minutes of permeabilization using BzATP as the porating agent, with  $68\% \pm 3\%$  of cells remaining intact whereas  $90\% \pm 4.5\%$  of cells remained intact when the porating agent was ATP. These results indicate that HPC can be permeabilized via P2Z receptors for up to 60 minutes using BzATP and for up to 90 minutes using ATP without a significant decrease in cell viability.

### Effect of intracellular trehalose on the frequency of CFU-GM, BFU-E, and CFU-GEMM following freeze-thawing

Cells must first survive freezing before freeze-drying can be attempted. To demonstrate the use of trehalose as an appropriate intracellular cryoprotectant, we permeabilized cells in medium

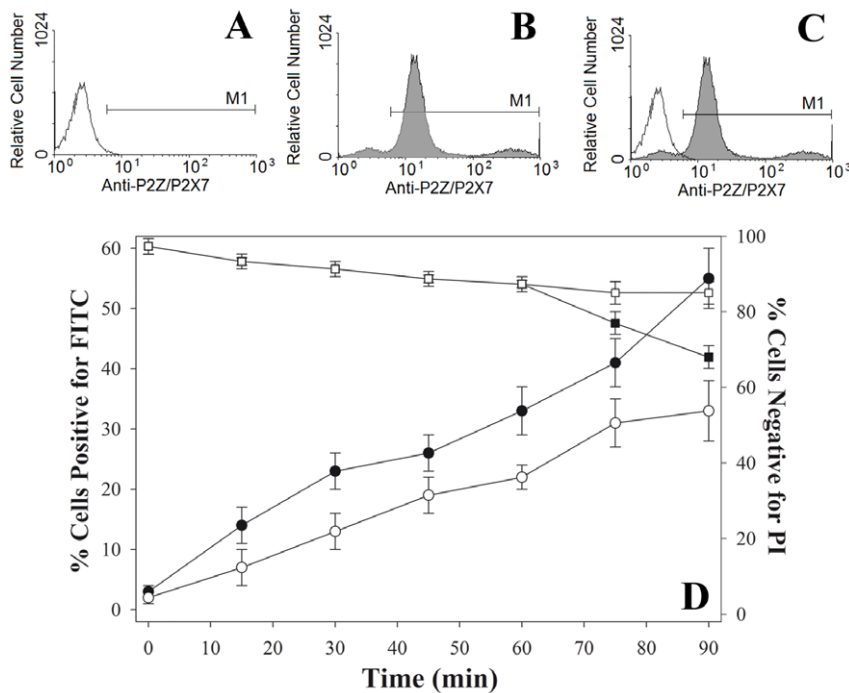

**Figure 1. Expression of P2Z receptor and dye uptake by porated HPC.** (A) Expression of P2Z receptor was measured by immunofluorescence and analyzed by flow cytometry. Negative control treated with secondary antibody alone signifying non-specific binding or background fluorescence (approximately  $1.6 \pm 0.3\%$ ). (B) Cells stained with anti-P2Z/P2X7-PE showed approximately  $58 \pm 4\%$  of HPC cells express the P2Z receptor compared to negative control. (C) Overlay of panels A and B showing comparison of background fluorescence to cells positive for P2Z. D) Poration efficiency of HPC: cells permeabilized in the presence of 200 mM trehalose for 0–90 min using 5 mM ATP (Open Circles) and 100  $\mu$ M BzATP (Closed Circles). Poration efficiency was quantified by determining FITC-positive cells with flow cytometry. Membrane integrity following permeabilization using 5 mM ATP (Open Squares) and 100  $\mu$ M BzATP (Closed Squares) was measured by quantifying propidium iodide-negative cells with flow cytometry. doi:10.1371/journal.pone.0012518.g001

containing 100  $\mu$ M BzATP and 200 mM trehalose for 75 minutes. Trehalose loaded cells were suspended in a formulation containing 6.8% trehalose/2% HES/5% HSA and then slowly cooled ( $1^\circ\text{C}/\text{minute}$ ) to  $-80^\circ\text{C}$  followed by storage at  $-80^\circ\text{C}$  for one week. Cryopreserved cells were rapidly thawed in a  $37^\circ\text{C}$  water bath and tested for clonogenic potential. Control groups for these experiments were freshly isolated cells and cells cryopreserved with 10% DMSO (1.4 M). As seen in Figure 2, cells cryopreserved trehalose produced comparable CFU to cells cryopreserved with DMSO. These data document that primary HPC loaded with trehalose can survive freeze-thawing when cryopreserved in medium containing 6.8% extracellular trehalose/2% HES/5% HSA. Furthermore, the frequency of CFU-GM, BFU-E, and CFU-GEMM is comparable to results obtained with fresh cells and those cryopreserved with DMSO.

#### Effect of lyophilization and reconstitution on frequency of CFU-GM, BFU-E, and CFU-GEMM

A representative plot of the temperature profile during the freeze drying cycle shows when vials were removed during lyophilization without interrupting the cycle to assess the effect of each step on the differentiation and clonogenic potential of the cells (Figure 3). Trehalose loaded cells were lyophilized in a formulation containing 6.8% trehalose/2% HES/5% HSA (w/v). Samples were removed during processing using an extractable arm into an antechamber (See methods) and stored at  $-80^\circ\text{C}$  until analysis. There were three main types of colonies that were enumerated: CFU-GM, BFU-E, and CFU-GEMM (Figure 4). There was no difference in the number of CFU produced by control groups and cells that were removed at the end of the

freezing step and thawed (Figure 5A). There was a gradual decrease in the number of CFU-GM and BFU-E for samples removed at the end of primary drying and during secondary drying; however, there were no differences in the number of CFU-

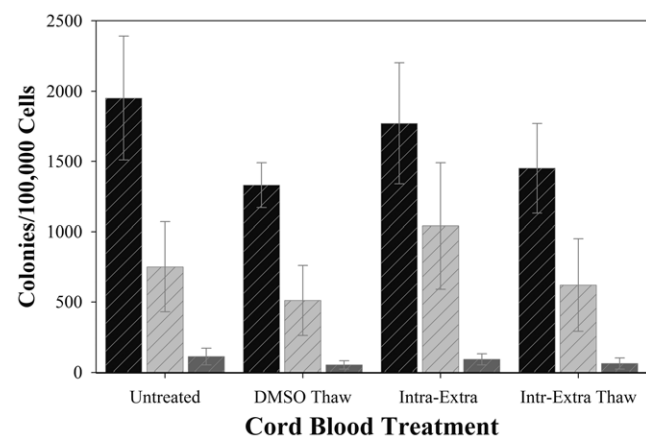

**Figure 2. HPC cell proliferation and differentiation of untreated and cryopreserved cells.** Frequency of CFU-GM (Black Stripes), BFU-E (Light Gray Stripes) and CFU-GEMM (Dark Gray Stripes) colonies following cryopreservation with trehalose were quantified using CFU assay (see Materials and Methods). Values are represented as the mean  $\pm$  standard deviation of the mean of 3 independent experiments for  $n=3$  subjects with 4 replicates and 4 individual culture plates for each control or treatment group (1 colony  $\geq 20$  cells). doi:10.1371/journal.pone.0012518.g002



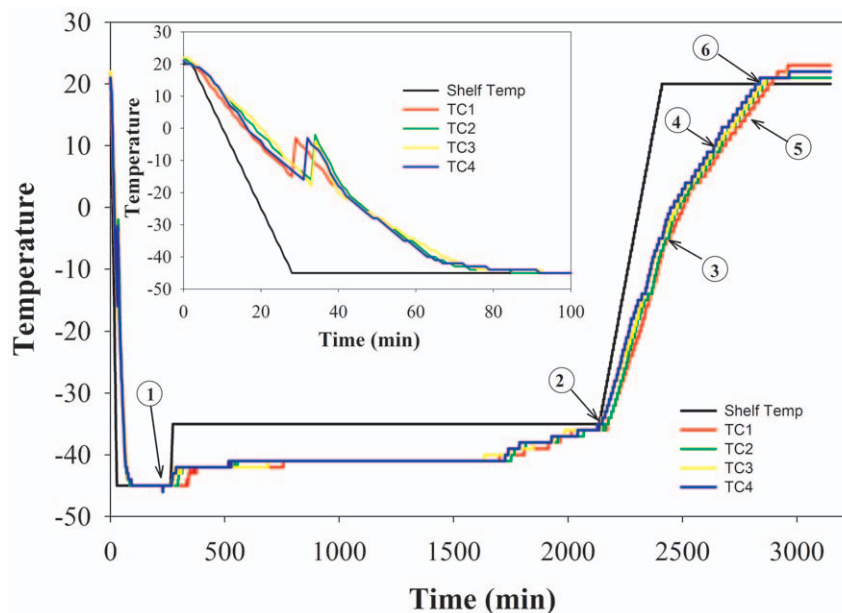

**Figure 3. Representative plot of processing variables.** Graph representing processing variables monitored during lyophilization used to optimize processing conditions. Optimization conditions were determined by testing vials removed during freeze drying cycle. Sample extraction was performed with a retractable arm via an antechamber equipped with an independent vacuum pump so samples could be removed at the following shelf temperatures: (1) end of freezing step at  $-45^{\circ}\text{C}$ , (2) end of primary drying at  $-35^{\circ}\text{C}$ , (3)  $5^{\circ}\text{C}$  during secondary drying, (4)  $10^{\circ}\text{C}$  during secondary drying, (5)  $15^{\circ}\text{C}$  during secondary drying, and (6)  $20^{\circ}\text{C}$  during secondary drying. Chamber was at ambient temperature and atmospheric pressure during the freezing step, and approximately  $10^{\circ}\text{C}$  and 80 mTorr during primary and secondary drying.  
doi:10.1371/journal.pone.0012518.g003

GEMM ( $\sim 82\%$ ). An ANOVA was performed on the results and the means were compared using Dennett's test, which controls overall error rate for comparing all other means with a designated control group's mean. CFU produced by thawed cells removed at the end of the freezing step and rehydrated cells removed at the end of primary drying were not statistically different from that for control cells. There was a gradual decrease in the number of CFU-GM and BFU-E produced by cells removed at increasing temperatures during secondary drying, which were statistically different from control groups. In marked contrast, cells produced

approximately 82% CFU-GEMM at all secondary drying shelf temperatures compared to control cells. There were no statistical differences in the means between CFU-GEMM produced by rehydrated cells and control cells.

In addition to measuring the differentiation and clonogenic potential of lyophilized cells, we also quantified the Tg and residual water content of the dry cake (Figure 5B). Not surprisingly, the Tg of samples increased as water was removed from samples. The final Tg of samples processed at a secondary drying temperature of  $20^{\circ}\text{C}$  was  $197 \pm 3^{\circ}\text{C}$ .

At the end of the primary drying step, there was approximately  $39.5 \pm 0.8 \text{ gH}_2\text{O}/100 \text{ g solid}$ . As expected, the residual water content decreased as secondary drying continued, which resulted in a concomitant decrease in cells' differentiation and clonogenic potential. This observation is consistent with results reported by Toner and colleagues who suggest that there may be an optimal residual water content required for stable dry cells[31].

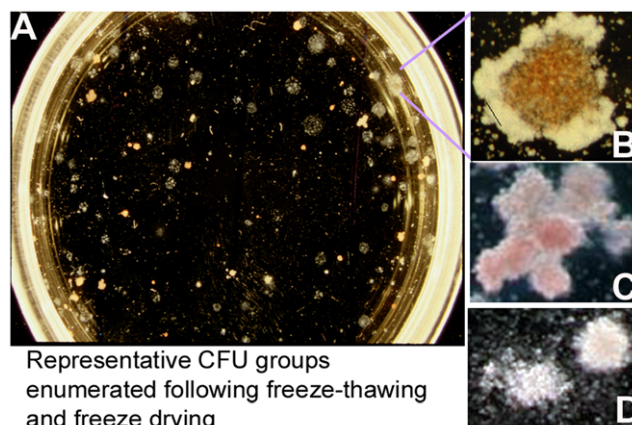

**Figure 4. Representative images of colony forming unit assay plate and colony scoring.** Appearance of: A) Semi-solid methylcellulose containing growth factors (SCF, IL-3, and EPO). B) Colonies scored as CFU-GEMM, C) Colonies scored as BFU-E, and D) Colonies scored as CFU-GM.  
doi:10.1371/journal.pone.0012518.g004

#### Effect of storage for 4 weeks at $25^{\circ}\text{C}$ on frequency of CFU-GM, BFU-E, and CFU-GEMM

To determine storage stability of lyophilized HPC, cells dried at a final secondary drying shelf temperature of  $15^{\circ}\text{C}$  were stored for 4 weeks at  $25^{\circ}\text{C}$  in the dark (Table 1). Cells reconstituted immediately after lyophilization produced approximately 40% CFU-GM, 40% BFU-E, and  $\sim 82\%$  CFU-GEMM relative to control. Cells reconstituted on after 28 days of storage at room temperature produced approximately 35% CFU-GM 26% BFU-E, and 82% CFU-GEMM compared to control. There was an initial decrease in the frequency of CFU-GM and BFU-E upon reconstitution immediately after lyophilization, but there was no further change in clonogenic output after 4 weeks of storage. There was not a significant difference in the frequency of CFU-GEMM by cells stored for 4 weeks at  $25^{\circ}\text{C}$  and untreated control

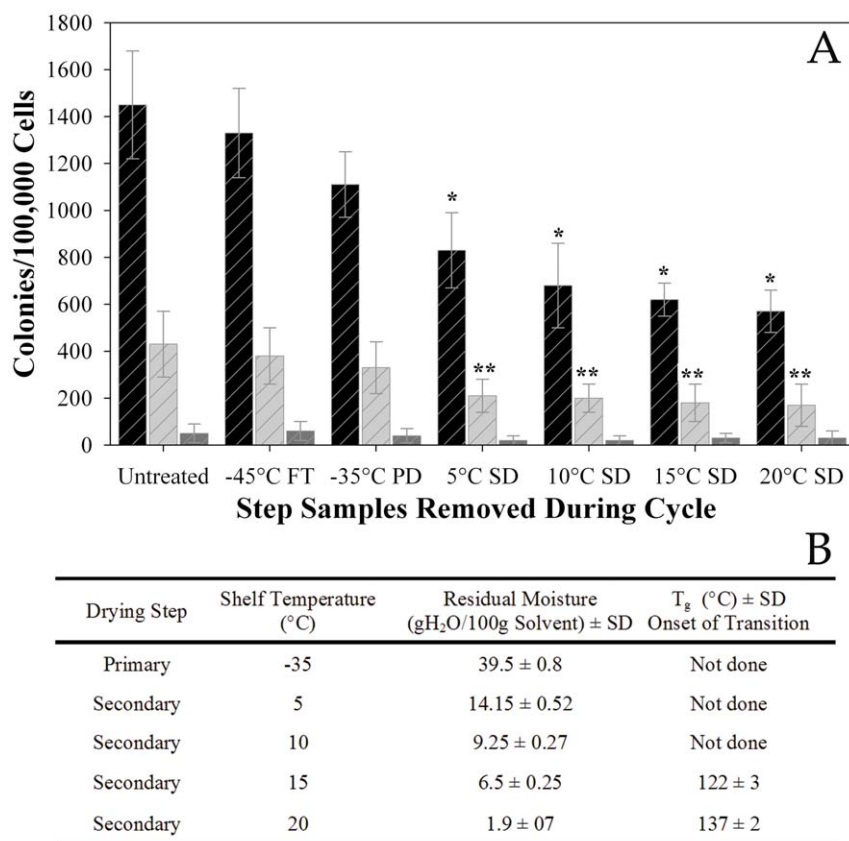

**Figure 5. Frequency of CFU-GM, BFU-E and CFU-GEMM colonies obtained following lyophilization and reconstitution.** A) HPC proliferation and differentiation of untreated and lyophilized cells were quantified by CFU assay (see Materials and Methods). Colonies were scored as CFU-GM (Black Stripes), BFU-E (Light Gray Stripes), or CFU-GEMM (Dark Gray Stripes). Values are represented as the mean ± standard deviation of the mean ( $p < 0.001$ ) of 3 independent experiments for  $n = 3$  subjects with 4 replicates and 4 individual culture plates for each control or treatment group. \* = statistically different from control and other test groups, \*\* = statistically different from control, but not statistically different from each other. B) Thermal analysis of samples removed during lyophilization. FS = freezing step, PD = primary drying, SD = secondary drying.  
doi:10.1371/journal.pone.0012518.g005

cells. These results indicate that the initial loss observed during secondary drying is the main loss of cells during freeze-drying and storage in the lyophilized formulation.

## Discussion

Requirements for successful stabilization of cells during freezing and drying include appropriate cryoprotectants and lyoprotectants to preserve cellular components and the dependent functions. Endogenous pore forming proteins, such as the P2Z receptor, are ideal for transport of low molecular weight compounds. P2Z receptors are activated specifically by the fully ionized form of

ATP (e.g., ATP<sup>4-</sup>). The pore opening is also temperature and pH dependent. Optimal conditions for pore formation is 37°C and pH 8.0–8.5, whereas the pore is inactive below 18°C and at pH 6.5[73]. To reduce cellular stress during permeabilization, we loaded trehalose into cells at 37°C in buffer with a pH of 7.45. The fraction of cells positive for the P2Z receptor was approximately 58%, which indicates that not all HPC derived from UBC express this pore forming protein. We did not see differences in the differentiation and clonogenic potential of trehalose-loaded HPC after freezing and thawing compared to control groups. However, we did observe a significant difference in differentiation and clonogenic potential after rehydration of desiccated cells capable

**Table 1. Storage stability of lyophilized HPC derived from umbilical cord as a function of clonogenic activity.**

| CFU Type | Untreated control | CFU Colonies/50 $\mu$ L ± SD immediately after reconstitution | CFU Colonies/50 $\mu$ L ± SD Storage @ 25°C for 4 wks in the dark |
|----------|-------------------|---------------------------------------------------------------|-------------------------------------------------------------------|
| CFU-GM   | 1450 ± 230        | 570 ± 90 (~40%)                                               | 510 ± 170 CFU-GM (~35%)                                           |
| BFU-E    | 430 ± 140         | 170 ± 70 BFU-E (~40%)                                         | 112 ± 68 BFU-E (~26%)                                             |
| CFU-GEMM | 50 ± 40           | 41 ± 22 CFU-GEMM (~82%)                                       | 36 ± 17 CFU-GEMM (~82%)                                           |

HPC were lyophilized in a formulation containing 6.8% trehalose/2% HES/5% HSA (w/v) and stored at 25°C for 4 weeks in the dark. Stability of CFU-GM, BFU-E, and CFU-GEMM.

doi:10.1371/journal.pone.0012518.t001

of producing BFU-E and CFU-GM. The non-ubiquitous expression of the P2Z receptor may explain the differences observed in the number of colonies produced by cells before and after freeze-drying.

To identify at point during during freeze-drying that cells lost function, we removed samples during the various steps of the lyophilization process. Lyophilization is a dehydration process comprising three main steps: freezing, primary drying, and secondary drying. The purpose of freezing is to separate the solvent (e.g., water) from the solutes. In a typical aqueous solution, the a large fraction of water will form ice crystals and the solutes will be concentrated in the remaining solution between the ice crystals. As cooling continues, the concentrated non-ice phase solidifies; yielding an amorphous matrix.

Upon completion of freezing, the lyophilization cycle moves into the primary drying phase. The main purpose of primary drying is to remove the water from the formulation by subliming the ice crystals formed during freezing. Primary drying begins by reducing the chamber pressure below the vapor pressure of ice and raising the shelf temperature to supply heat for sublimation of ice. The ice-gas interface begins at the top of the cake and proceeds downwards to the bottom of the vial. Upon completion of primary drying, there is still a considerable amount of residual water remaining in the formulation.

The purpose of secondary drying is to reduce to remove the water that did not freeze and in the amorphous phase by desorption, without compromising the volume of the cake formed by the partially-dried formulation. Desorption of water is accomplished by raising the shelf temperature. Secondary drying is complete when the desired residual water content is achieved for long-term stability (product and formulation specific).

During the first two steps of lyophilization, there was not a significant reduction in differentiation and clonogenic potential of HPC loaded with trehalose. When samples were removed during secondary drying, only cells capable of producing CFU-GEMM survived to levels comparable to control groups. ANOVA performed on results suggests the critical processing step for BFU-E reduction is during secondary drying at 5°C. CFU produced by cells exposed to higher secondary drying temperatures were not statistically different from those removed from the lyophilizer after secondary drying at 5°C. It may be possible to increase differentiation and clonogenic potential by simply optimizing the freeze-drying process. The number of CFU-GM produced by cells removed at 5°C were also significantly different from control groups. However, there was a gradual decrease in the number of CFU-GM produced by cells removed downstream from this time point, suggesting the damage may have occurred at the onset of secondary drying which result in cumulative losses in CFU production. These cells may require both cycle optimization and additional formulation development to increase clonogenic potential to levels obtained with CFU-GEMM. It is unknown if CFU-GEMM express a higher number of P2Z receptors, and as a result, have an increased survival rate due to higher amounts of intracellular trehalose.

The frequency of BFU-E, CFU-GM, and CFU-GEMM observed in this study are significantly greater than results reported previously by Natan and colleagues[74]. In their study, human UBC were preserved with the antioxidant epigallocatechin gallate (EGCG) and trehalose added to the medium. Cells were then frozen using a directional freezing device. The frozen samples were placed in a Labconco Freezone Plus 6 freeze dryer near the condenser for 3.5 days. The authors describe this freeze-drying system as “a very simple device, in which neither shelf temperature nor vacuum pressure can be controlled or recorded”. After

processing, samples were stored at 2–8°C and 25°C for 1 week. The number of CD34+ cells were quantified by flow cytometric analysis after thawing frozen samples and rehydrating lyophilized samples. There were approximately  $3.5 \pm 6 \times 10^6$  and  $5.3 \pm 12.3 \times 10^6$  CD34+ cells after thawing and rehydration of lyophilized cells, respectively compared to fresh control ( $5.4 \pm 4.7 \times 10^6$ ). These CD34+ cells produced  $7.83 \pm 11.69$  and  $2.56 \pm 3.43$  BFU-E following thawing and rehydration, respectively compared to control ( $14.67 \pm 15.89$ ). The number of CFU-E produced by CD34+ cells were approximately  $29.33 \pm 38.99$  and  $18.78 \pm 14.35$  after thawing and rehydration, respectively compared to control ( $16.33 \pm 9.29$ ). They did not report any observance of CFU-GEMM colonies.

The greater differentiation and clonogenic potential we observed when compared to that of Natan et al. may be directly related to the presence of intracellular trehalose. The results presented here show that transfer of trehalose into HPC was sufficient to maintain cell function during drying, storage at 25°C for 4 weeks, and reconstitution.

We propose that trehalose protects cells by the following mechanisms: (1) during cooling, ice nucleation occurs in the extracellular environment while the intracellular water supercools. Because of extracellular ice formation, solute concentrations are higher outside the cells than inside. As a result, water diffuses out of the cell. The cells dehydrate sufficiently such that intracellular ice formation does not occur. (2) As the temperature continues to decrease, the unfrozen solution within cells and the extracellular unfrozen fraction solidify into glass. The viscosity is sufficiently high to reduce molecular motion on a practical time scale. (3) The glass is maintained during desiccation and continues to protect cells during storage in the dried state. (4) Due to the relatively high amount of residual water, approximately 6.5%, for cells processed at 15°C, it would be unlikely that the water replacement hypothesis (see below) explains a mechanism of protection for cells processed at 15°C. In this case, the residual water could maintain hydration of biomolecules and serve to reduce damage during the drying and storage.

However, samples exposed to secondary drying at 20°C had approximately 1.8% residual water. For these cells in these samples, the water replacement hypothesis is a reasonable mechanism. The water replacement hypothesis suggests that adding trehalose before drying lowers the transition temperature ( $T_m$ ) of the dry membranes by replacing the water between the lipid headgroups, preventing the phase transition and its accompanying leakage upon rehydration[75,76]. Desorption of water without trehalose increases the headgroup packing of phospholipid bilayers and forces the acyl chains together, increasing the probability of van der Waals interactions[77]. As a result, the lipids may undergo a transition from liquid crystalline to gel phase[75]. Upon rehydration, dry membranes, which are in gel phase at room temperature, undergo a transition from gel to liquid crystal phase. As the membranes pass through this phase transition there are regions with packing defects, making the membranes leaky; either due to membrane fusion or the induction of the hexagonal II phase[78]. In addition to lowering the  $T_m$  of membranes, trehalose and sucrose have been shown to preserve both structure and function of isolated proteins during drying[79,80]. This ability to stabilize proteins during drying results from the disaccharides forming hydrogen bonds with the proteins when water is removed, thus preventing protein denaturation[81,82,83].

In conclusion, our results demonstrate that high levels of immature primary HPC derived from UCB can be recovered after lyophilization and ambient storage when permeabilized with the



P2Z receptor and loaded with intracellular trehalose. Furthermore, improving the levels of mature HPC may be achieved by optimization of lyophilization processing conditions and the formulation. This methodology may be utilized with other cells expressing this pore forming protein. The P2Z receptor present in the brain is expressed by microglia and ependymal cells rather than neurons[58]. Since microglia are the resident macrophages of the brain[84], it is consistent with the finding of the P2Z receptor in peripheral macrophages and macrophage-like cells found in the lung and spleen[57]. Expression of this receptor has also been described in other tissues and systems. For example, primary human cells such as fibroblasts[85], fetal keratinocytes[86], vascular endothelial cells [87] and vein smooth muscle[88] have been permeabilized via P2Z receptor-associated pores. Cells derived from mice, such as medulla oblongata[89], parotid acinar cells[90], and spinal cord cells[89] along with immortal microglial[91], astrocytes [92], CHO-K1[91], and mesangial cells[93],[58] have also been permeabilized with ATP via the P2Z receptor. However, the most prominent expression is the hematopoietic tissue: dendritic cells[59,94], duct cells[90], erythrocytes[95] and erythroid progenitors, granulocytes[58], macro-

phages[59], mast cells, monocytes[58,96], neutrophils[64], peripheral blood mononuclear cells (CD34+)[97], promyelocytes[64,98], and thymocytes[99] including B lymphocytes[85] and T lymphocytes[100]. With such a variety of cells already known to express this protein, there is potentially a wide application for freeze-drying cells with intracellular trehalose followed by ambient storage.

## Acknowledgments

The authors would like to acknowledge Perkin-Elmer for supplying the Diamond DSC used in this study. We also would like to acknowledge the technical assistance of Karen Helm and Michael Ashton of the University of Colorado Cancer Center Flow Cytometry Core Facility who is supported by NIH grant 5P30CA46934-15.

## Author Contributions

Conceived and designed the experiments: SB DP JC. Performed the experiments: SB. Analyzed the data: SB. Contributed reagents/materials/analysis tools: DP JC. Wrote the paper: SB. Manuscript revision and editing: DP JC.

## References

- Kondo M, Wagers AJ, Manz MG, Prohaska SS, Scherer DC, et al. (2003) Biology of Hematopoietic Stem Cells and Progenitors: Implications for Clinical Application. *Annual Review of Immunology* 21: 759–806.
- Bhatia R, Van Heijzen K, Palmer A, Komiya A, Slovak ML, et al. (2005) Longitudinal Assessment of Hematopoietic Abnormalities After Autologous Hematopoietic Cell Transplantation for Lymphoma. *J Clin Oncol* 23: 6699–6711.
- Congdon CC (1957) Bone marrow transplantation in animals exposed to whole body irradiation. *J Cell Physiol* 50(Suppl 1): 103–108.
- Hadzantonis M, O'Neill H (1999) Review: dendritic cell immunotherapy for melanoma. *Cancer Biother Radiopharm* 14: 11–22.
- Lorenz E, Uphoff D, Reid TR, Shelton E (1951) Modification of irradiation injury in mice and guinea pigs by bone marrow injections. *J Natl Cancer Inst* 12: 197–201.
- Nademanee A, Sniecinski I, Schmidt GM, Dags AC, O'Donnell MR, et al. (1994) High-dose therapy followed by autologous peripheral-blood stem-cell transplantation for patients with Hodgkin's disease and non-Hodgkin's lymphoma using unprimed and granulocyte colony-stimulating factor-mobilized peripheral-blood stem cells. *J Clin Oncol* 12: 2176–2186.
- Thomas ED, Lochte HL, Lu WC, Ferrelle JW (1957) Intravenous infusion of bone marrow in patients receiving radiation and chemotherapy. *N Engl J Med* 257: 491–496.
- Voermans C, van Hennik PB, van Der Schoot CE (2001) Homing of human hematopoietic stem and progenitor cells: new insights, new challenges? *J Hematother Stem Cell Res* 10: 725–738.
- Mazur P (1984) Freezing of living cells: mechanisms and implications. *Am J Physiol Cell Physiol (Cell Physiol)* 16: 247: C125–C142.
- Bruni F, Leopold AC (1991) Glass transitions in soybean seed. Relevance to anhydrous biology. *Plant Physiol* 96: 660–663.
- Her ML, Nail SL (1994) Measurement of Glass Transition Temperatures of Freeze-Concentrated Solutes by Differential Scanning Calorimetry. *Pharmaceutical Research* 11: 54–59.
- McGee HA, Martin WJ (1962) Cryochemistry. *Cryogenics* 2: 257–267.
- Gao D, Critser KJ (2000) Mechanisms of cryoinjury in living cells. *ILAR J* 41: 187–196.
- McGann LE (1978) Differing Actions of Penetrating and Nonpenetrating Cryoprotective Agents. *Cryobiology* 15: 382–390.
- Takahashi T, Hirsh A, Erbe E, Williams RJ (1988) Mechanism of cryoprotection by extracellular polymeric solutes. *Biophys J* 54: 509–518.
- Lim M, Wu H, Breckell M, Birch J (2006) Influence of the glass transition and storage temperature of frozen peas on the loss of quality attributes. *International Journal of Food Science and Technology* 41: 507–512.
- Spies G, Kresin M, Loges K, Sputtek A, Heschel I, et al. (1995) The Effect of Storage Temperature on the Stability of Frozen Erythrocytes. *Cryobiology* 32: 366–378.
- Slade L, Levine H (1995) Glass transitions and water-food structure interactions. In: Kinsella J, ed. *Advances in Food and Nutrition Research*. San Diego: Academic. pp 103–269.
- Abrahamsen Jenny F, Bakken AM, Bruserud O (2002) Cryopreserving human peripheral blood progenitor cells with 5-percent rather than 10-percent DMSO results in less apoptosis and necrosis in CD34+ cells. *Transfusion* 42: 1573–1580.
- Alessandrino EP, Bernasconi P, Caldera D, Colombo A, Bonfichi M, et al. (1999) Adverse events occurring during bone marrow or peripheral blood progenitor cell infusion: analysis of 126 cases. *Bone Marrow Transplant* 23: 533–537.
- Davis J, Rowley S, Braine H, Piantadosi S, Santos G (1990) Clinical toxicity of cryopreserved bone marrow graft infusion. *Blood* 75: 781–786.
- Shpall EJ, LeMaistre CF, Holland K, Ball E, Jones RB, et al. (1997) A Prospective Randomized Trial of Buffy Coat Versus CD34-Selected Autologous Bone Marrow Support in High-Risk Breast Cancer Patients Receiving High-Dose Chemotherapy. *Blood* 90: 4313–4320.
- Stronck DF, Fautsch SK, Lasky LC, Hurd DD, Ramsay NK, et al. (1991) Adverse reactions in patients transfused with cryopreserved marrow. *Transfusion* 31: 521–526.
- Halle P, Tournilhac O, Knopinska-Poslusny W, Kanold J, Gembara P, et al. (2001) Uncontrolled-rate freezing and storage at  $-80^{\circ}\text{C}$ , with only 3.5% DMSO in cryoprotective solution for 108 autologous peripheral blood progenitor cell transplantations. *Transfusion* 41: 667–673.
- Beaujean F, Bourhis JH, Bayle CH, Jouault H, Divine M, et al. (1998) Successful cryopreservation of purified autologous CD34+ cells: influence of freezing parameters on cell recovery and engraftment. *Bone Marrow Transplantation* 22: 1091–1096.
- Woods EJ, Liu J, Derrow CW, Smith FO, Williams DA, et al. (2000) Osmometric and Permeability Characteristics of Human Placental/Umbilical Cord Blood CD34+ cells and their application to cryopreservation. *Journal of Hematotherapy and Stem Cell Research* 9: 161–173.
- Honadel TE, Killian GR (1988) Cryopreservation of murine embryos with trehalose and glycerol. *Cryobiology* 25: 331–337.
- Hino A, Mihara K, Nakashima K, Takano H (1990) Trehalose levels and survival ratio of freeze-tolerant versus freeze-sensitive yeasts. *Appl Environ Microbiol* 56: 1386–1391.
- Carpenter JF, Prestrelski SJ, Arakawa T (1993) Separation of Freezing- and Drying-Induced Denaturation of Lyophilized Proteins Using Stress-Specific Stabilization: I. Enzyme Activity and Calorimetric Studies. *Archives of Biochemistry and Biophysics* 303: 456–464.
- Sano F, Asakawa N, Inoue Y, Sakurai M (1999) A Dual Role for Intracellular Trehalose in the Resistance of Yeast Cells to Water Stress. *Cryobiology* 39: 80–87.
- Chen T, Acker JP, Eroglu A, Cheley S, Bayley H, et al. (2001) Beneficial Effect of Intracellular Trehalose on the Membrane Integrity of Dried Mammalian Cells. *Cryobiology* 43: 168–181.
- Puhlev I, Guo N, Brown DR, Levine F (2001) Desiccation Tolerance in Human Cells. *Cryobiology* 42: 207–217.
- Carpenter JF, Hand SC, Crowe LM, Crowe JH (1986) Cryoprotection of phosphofructokinase with organic solutes: characterization of enhanced protection in the presence of divalent cations. *Arch Biochem Biophys* 250: 505–512.
- Carpenter JF, Crowe LM, Crowe JH (1987) Stabilization of phosphofructokinase with sugars during freeze-drying: characterization of enhanced protection in the presence of divalent cations. *Biochem Biophys Acta* 923: 109–115.
- Crowe JH, Carpenter JF, Crowe LM (1998) The Role of Vitrification in Anhydrobiosis. *Annu Rev Physiol* 60: 73–103.
- Green JL, Angell CA (1989) Phase relation and vitrification in saccharide-water solutions and the trehalose anomaly. *J Phys Chem* 93: 2880–2882.
- Wolfe J, Gary G (1999) Freezing, Drying, and/or Vitrification of Membrane-Solute-Water Systems. *Cryobiology* 39: 103–129.

38. Eroglu A, Russo MJ, Bieganski R, Fowler A, Cheley S, Bayley H, Toner M (2000) Intracellular trehalose improves the survival of cryopreserved mammalian cells. *Nature Biotechnology* 18: 163–167.
39. Eroglu A, Toner M, Toth TL (2002) Beneficial effect of microinjected trehalose on the cryosurvival of human oocytes. *Fertility and Sterility* 77: 152–158.
40. Eroglu A, Lawitts JA, Toner M, Toth TL (2003) Quantitative microinjection of trehalose into mouse oocytes and zygotes, and its effect on development\*1. *Cryobiology* 46: 121–134.
41. Russo M, Bayley H, Toner M (1997) Reversible permeabilization of plasma membranes with an engineered switchable pore. *Nature Biotechnology* 15: 278–282.
42. Beattie GM, Crowe JH, Lopez AD, Cirulli V, Ricordi C, et al. (1997) Trehalose: a cryoprotectant that enhances recovery and preserves function of human pancreatic islets after long-term storage. *Diabetes* 46: 519–523.
43. Garcia de Castro A, Tunnaciff A (2000) Intracellular trehalose improves osmotolerance but not desiccation tolerance in mammalian cells. *FEBS Letters* 487: 199–202.
44. Gordon SL, Oppenheimer SR, Mackay AM, Brunnabend J, Puhlev I, et al. (2001) Recovery of Human Mesenchymal Stem Cells Following Dehydration and Rehydration. *Cryobiology* 43: 182–187.
45. Guo N, Iskren P, Brown DR, Mansbridge J, Levine F (2000) Trehalose expression confers desiccation tolerance on human cells. *Nature Biotechnology* 18: 168–171.
46. Kheirloomoom A, Satpathy GR, Torok Z, Banerjee M, Bali R, et al. (2005) Phospholipid vesicles increase the survival of freeze-dried human red blood cells. *Cryobiology* 51: 290–305.
47. Wolkers WF, Walker NJ, Tablin F, Crowe JH (2001) Human Platelets Loaded with Trehalose Survive Freeze-Drying. *Cryobiology* 42: 79–87.
48. Buchanan SS, Menze MA, Hand SC, Pyatt DW, Carpenter JF (2005) Cryopreservation of Human Hematopoietic Stem and Progenitor Cells Loaded with Trehalose: Transient Permeabilization via the ATP-Dependent P2Z Receptor Channel. *Cell Preservation Technology* 3: 212–222.
49. Chretien S, Varlet P, Verdier F, Gobert S, Cartron J-P, et al. (1996) Erythropoietin-induced erythroid differentiation of the human erythroleukemia cell line TF-1 correlates with impaired STAT5 activation. *EMBO* 15: 4174–4181.
50. Kitamura T, Tange T, Terasawa T, Chiba S, Kuwaki T, et al. (1989) Establishment and Characterization of a Unique Human Cell Line That Proliferates Dependently on GM-CSF, IL-3, or Erythropoietin. *Journal of Cellular Physiology* 140: 323–334.
51. Kitamura T, Tojo A, Kuwaki T, Chiba S, Miyazono K, et al. (1989) Identification and Analysis of Human Erythropoietin Receptors on a Factor-Dependent Cell Line, TF-1. *Blood* 73: 375–380.
52. Testa U, Grignani F, Hassan HJ, Rogaia D, Masciulli R, et al. (1998) Terminal megakaryocytic differentiation of TF-1 cells is induced by phorbol esters and thrombopoietin and is blocked by expression of PML/RARalpha fusion protein. *Leukemia* 12: 563–5670.
53. Lai J-M, Lu C-Y, Yang-Yen H-F, Chang Z-F (2001) Lysophosphatidic acid promotes phorbol-ester-induced apoptosis in TF-1 cells by interfering with adhesion. *Biochem J* 359: 227–233.
54. Gordon JL (1986) Extracellular ATP: effects, sources and fate. *Biochem J* 233: 309–319.
55. MacKenzie AB, Sruprenant A, North AB (1999) Functional and Molecular Diversity of Purinergic Ion Channel Receptors. *Ann NY Acad Sci* 868: 716–729.
56. Steinberg TH, Silverstein SC (1989) ATP permeabilization of the plasma membrane. *Methods Cell Biol* 31: 45–61.
57. Surprenant A, Rassendren R, Kawashima E, North RA, Buell G (1996) The cytolytic P2Z receptor for extracellular ATP identified as a P2X receptor (P2X7). *Science* 272: 735–738.
58. Collo G, Neidhart S, Kawashima E, Kosco-Vilbois M, North RA, et al. (1997) Tissue Distribution of the P2X7 Receptor. *Neuropharmacology* 36: 1277–1283.
59. Coutinho-Silva R, Alves LA, Savino W, Persechini PM (1996) A cation non-selective channel induced by extracellular ATP in macrophages and phagocytic cells of the thymic reticulum. *Biochimica et Biophysica Acta* 1278: 125–130.
60. Nihei OK, Savino W, Alves LA (2000) Procedures to characterize and study P2Z/P2X7 purinoceptor: flow cytometry as a promising practical, reliable tool. *Mem Inst Oswaldo Cruz* 95: 415–428.
61. Smart ML, Gu B, Panchal RG, Wiley J, Cromer B, et al. (2003) P2X7 Receptor Cell Surface Expression and Cytolytic Pore Formation Are Regulated by a Distal C-terminal Region. *J Biol Chem* 278: 8853–8860.
62. Di Virgilio F (1995) The P2Z purinoceptor: an intriguing role in immunity, inflammation and cell death. *Immunology Today* 16: 524–528.
63. Di Virgilio F, Chiozzi P, Ferrari D, Falzoni S, Sanz JM, et al. (2001) Nucleotide receptors: an emerging family of regulatory molecules in blood cells. *Blood* 97: 587–600.
64. Suh B-C, Kim J-S, Namgung U, Ha H, Kim K-T (2001) P2X7 Nucleotide Receptor Mediation of Membrane Pore Formation and Superoxide Generation in Human Promyelocytes and Neutrophils. *J Immunol* 166: 6754–6763.
65. Motorin D, Bakken A, Foss Abrahamsen J, Ernst P, Bruserud Ay (2003) Characterization of clonogenic progenitors in autologous peripheral blood stem cell grafts: evaluation of a simple in vitro assay suitable for routine clinical use. *Hematology* 8: 313–318.
66. Podesta M, Piaggio G, Pitto A, Zocchi E, Soracco M, et al. (2001) Modified in vitro conditions for cord blood-derived long-term culture-initiating cells. *Experimental Hematology* 29: 309–314.
67. Searles JA, Carpenter JF, Randolph TW (2001) The ice nucleation temperature determines the primary drying rate of lyophilization for samples frozen on a temperature-controlled shelf. *Journal of Pharmaceutical Sciences* 90: 860–871.
68. Menze MA, Clavenna M, SC Hand (2005) Depression of cell metabolism and proliferation by membrane-permeable and -impermeable modulators: Role for AMP-to-ATP ratio. *American Journal of Physiology (Regul Integr Comp Physiol)* 288: R501–R510.
69. Buchanan SS (2006) Preservation of Two Therapeutic Biopharmaceuticals Using Sugars and Polymers: Hematopoietic Stem and Progenitor Cells and a Live Attenuated Viral Vaccine. *Denver: University of Colorado Health Sciences*. 229 p.
70. Buchanan SS, Elliott GD, Toner M, Pyatt DW, Carpenter JF (2010) Mechanistic Study on Loss of Clonogenic Potential of a Lyophilized CD34+ Cell Line during Processing and Following Ambient Storage.
71. Buchanan SS, Gross SA, Acker JP, Toner M, Carpenter JF, et al. (2004) Cryopreservation of Stem Cells Using Trehalose: Evaluation of the Method Using a Human Hematopoietic Cell Line. *Stem Cells and Development* 13: 295–305.
72. Reeb BA (1992) Bone marrow and stem cell processing: a manual of current techniques. Philadelphia: F.A. Davis.
73. Steinberg TH, Newman AS, Swanson JA, Silverstein SC (1987) ATP-permeabilizes the plasma membrane of mouse macrophages to fluorescent dyes. *J Biol Chem* 262: 8884–8888.
74. Natan D, Nagler A, Arav A (2009) Freeze-Drying of Mononuclear Cells Derived from Umbilical Cord Blood Followed by Colony Formation. *PLoS ONE* 4: e5240.
75. Crowe JH, Crowe LM, Carpenter JF, Rudolph AS, Wistrom CA, et al. (1988) Interactions of sugars with membranes. *Biochim Biophys Acta* 947: 367–384.
76. Crowe JH, Hoekstra FA, Crowe LM (1989) Membrane Phase Transitions are Responsible for Imbibitional Damage in Dry Pollen PNAS 86: 520–523.
77. Crowe LM, Crowe JH, Alan Rudolph, Womersley C, Appel L (1985) Preservation of freeze-dried liposomes by trehalose. *Archives of Biochemistry and Biophysics* 242: 240–247.
78. Blok MC, Neut-Kok ECMVD, Deenen LLMV, Gier JD (1975) The effect of chain length and lipid phase transitions on the selective permeability properties of liposomes. *Biochimica et Biophysica Acta -Biomembranes* 406: 187–196.
79. Carpenter JF, Martin B, Crowe LM, Crowe JH (1987) Stabilization of phosphofructokinase during air-drying with sugars and sugar/transition metal mixtures. *Cryobiology* 24: 455–464.
80. Crowe JH, Crowe LM, Carpenter JF, Aurell WC (1987) Stabilization of dry phospholipids and proteins by sugars. *Biochem J* 242: 1–10.
81. Allison SD, Chang B, Randolph TW, Carpenter JF (1999) Hydrogen Bonding between Sugar and Protein Is Responsible for Inhibition of Dehydration-Induced Protein Unfolding. *Archives of Biochemistry and Biophysics* 365: 289–298.
82. Carpenter JF, Crowe JH (1988) The mechanism of cryoprotection of proteins by solutes. *Cryobiology* 25: 244–255.
83. Carpenter JF, Crowe JH (1989) An infrared spectroscopic study of the interactions of carbohydrates with dried proteins. *Biochemistry* 28: 3916–3922.
84. Kreutzberg GW (1996) Microglia: a sensor for pathological events in the CNS. *Trends in neuroscience* 19: 312–318.
85. Solini A, Chiozzi P, Morelli A, Fellin R, Di Virgilio F (1999) Human primary fibroblasts in vitro express a purinergic P2X7 receptor coupled to ion fluxes, microvesicle formation and IL-6 release. *J Cell Sci* 112: 297–305.
86. Greig AVH, Linde C, Cambrey A, Burnstock G (2003) Purinergic Receptors Are Part of a Signaling System for Keratinocyte Proliferation, Differentiation, and Apoptosis in Human Fetal Epidermis. *J Invest Dermatol* 121: 1145–1149.
87. El-Moatassim G, Dornand J, Mani JC (1992) Extracellular ATP and cell signalling. *Biochim Biophys Acta* 1134: 31–45.
88. Cario-Toumaniantz C, Loirand G, Ladoux A, Pacaud P (1998) P2X7 Receptor Activation-Induced Contraction and Lysis in Human Saphenous Vein Smooth Muscle. *Circ Res* 83: 196–203.
89. Deuchars SA, Atkinson L, Brooke RE, Musa H, Milligan CJ, et al. (2001) Neuronal P2X7 Receptors Are Targeted to Presynaptic Terminals in the Central and Peripheral Nervous Systems. *J Neurosci* 21: 7143–7152.
90. Li Q, Luo, Xiang, Zeng, Weizhong, Muallem, Shmuel (2003) Cell-specific Behavior of P2X7 Receptors in Mouse Parotid Acinar and Duct Cells. *J Biol Chem* 278: 47554–47561.
91. Michel ADCI, Hibell AD, Simon J, Humphrey PP (1998) Identification and characterization of an endogenous P2X7 (P2Z) receptor in CHO-K1 cells. *Br J Pharmacol* 125: 1194–1201.
92. Ballerini PRM, Di Iorio P, Renzetti A, Giuliani P, D'Alimonte I, Trubiani O, Caciagli F, Ciccarelli R (1996) Rat astroglial P2Z (P2X7) receptors regulate intracellular calcium and purine release. *Neuroreport* 7: 2533–2537.
93. Schulze-Lohoff EHC, Rost S, Arnold S, Gruber A, Brune B, Sterzel RB (1998) Extracellular ATP causes apoptosis and necrosis of cultured mesangial cells via P2Z/P2X7 receptors. *Am J Physiol* 275: F962–F971.
94. Nihei OK, de Carvalho ACC, Savino W, Alves LA (2000) Pharmacologic properties of P2Z/P2X7 receptor characterized in murine dendritic cells: role on the induction of apoptosis. *Blood* 96: 996–1005.

95. Sluyter R, Shemon AN, Barden JA, Wiley JS (2004) Extracellular ATP Increases Cation Fluxes in Human Erythrocytes by Activation of the P2X7 Receptor. *J Biol Chem* 279: 44749–44755.
96. Gudipaty L, Humphreys BD, Buell G, Dubyak GR (2001) Regulation of P2X7 nucleotide receptor function in human monocytes by extracellular ions and receptor density. *Am J Physiol Cell Physiol* 280: C943–953.
97. Steidl U, Bork S, Schaub S, Selbach O, Seres J, et al. (2004) Primary human CD34+ hematopoietic stem and progenitor cells express functionally active receptors of neuromediators. *Blood* 104: 81–88.
98. Eschke D, Wust M, Hauschildt S, Nieber K (2002) Pharmacological characterization of the P2X(7) receptor on human macrophages using the patch-clamp technique. *Naunyn Schmiedeberg's Arch Pharmacol* 365: 168–171.
99. Apasov S, Koshiba M, Chused T, Sitkovsky M (1997) Effects of extracellular ATP and adenosine on different thymocyte subsets: possible role of ATP-gated channels and G protein-coupled purinergic receptor. *J Immunol* 158: 5095–5105.
100. Budagian V, Bulanova E, Brovko L, Orinska Z, Fayad R, et al. (2003) Signaling through P2X7 Receptor in Human T Cells Involves p56lck, MAP Kinases, and Transcription Factors AP-1 and NF-kappa B. *J Biol Chem* 278: 1549–1560.
